# Supplementary figures and images for: Enhanced solid-state electrochemiluminescence of Ru(bpy)32+with nano-CeO2modified carbon paste electrode and its application in tramadol determination
Source: Royal Society of Chemistry journal article supplement (doi:10.1039/c4ay02772h), 2014-12-19

Supplementary data

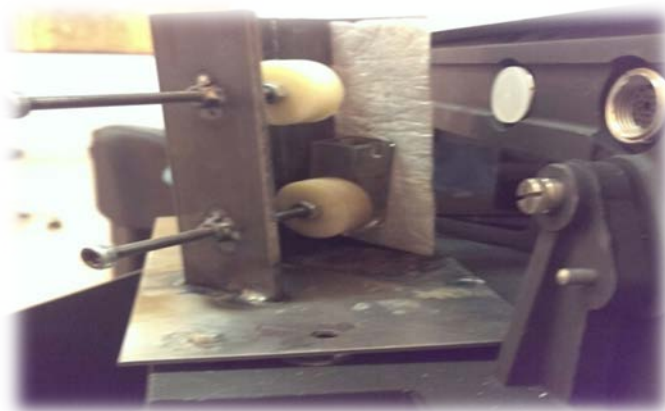

Fig.S1

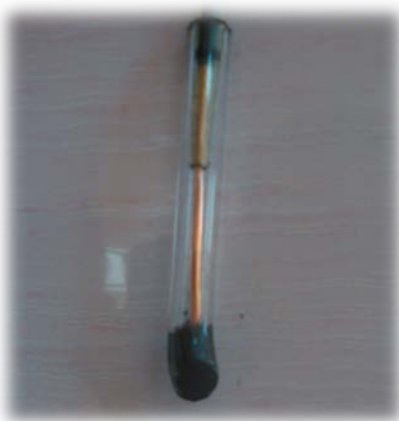

Fig.S2

Supplement: c4ay02772h1.pdf [file c4ay02772h1.pdf]
